# Supplementary material for: Facile one-pot synthesis of urchin-like Fe–Mn binary oxide nanoparticles for effective adsorption of Cd(ii) from water
Source: Royal Society of Chemistry journal article supplement (doi:10.1039/c6ra21030a), 2016-01-01
Supplement: c6ra21030a1.pdf [file c6ra21030a1.pdf]

## SUPPORTING INFORMATION

### **Facile one-pot synthesis of urchin-like Fe-Mn binary oxide nanoparticles for effective adsorption of Cd(II) from water**

Lu-Bin Zhong,<sup>a</sup> Jun Yin,<sup>a,b</sup> Shao-Gen Liu,<sup>b</sup> Qing Liu,<sup>a,c</sup> Yue-San Yang<sup>a,c</sup> and Yu-Ming Zheng<sup>\*a</sup>

<sup>a</sup>CAS Key Laboratory of Urban Pollutant Conversion, Institute of Urban Environment, Chinese Academy of Sciences, 1799 Jimei Road, Xiamen 361021, P. R. China.

<sup>b</sup>School of Environment and Energy Engineering, Anhui Jianzhu University, Hefei 230601, China.

<sup>c</sup>College of Resources and Environment, University of Chinese Academy of Sciences, Beijing 100049, China.

E-mail address: ymzheng@iue.ac.cn; Fax: +86-592-6190977; Tel:+86-592-6190785

**Table S1** Thermodynamic parameters for Cd(II) adsorption on UMFBO at different temperatures.

| Temperature<br>(K) | $K_d$<br>(L g <sup>-1</sup> ) | $\Delta G$<br>(kJ mol <sup>-1</sup> ) | $\Delta H$<br>(kJ mol <sup>-1</sup> ) | $\Delta S$<br>(J (mol K) <sup>-1</sup> ) |
|--------------------|-------------------------------|---------------------------------------|---------------------------------------|------------------------------------------|
| 283                | 1350                          | -16.96                                |                                       |                                          |
| 298                | 1400                          | -17.95                                | 5.174                                 | 0.078                                    |
| 313                | 1650                          | -19.30                                |                                       |                                          |

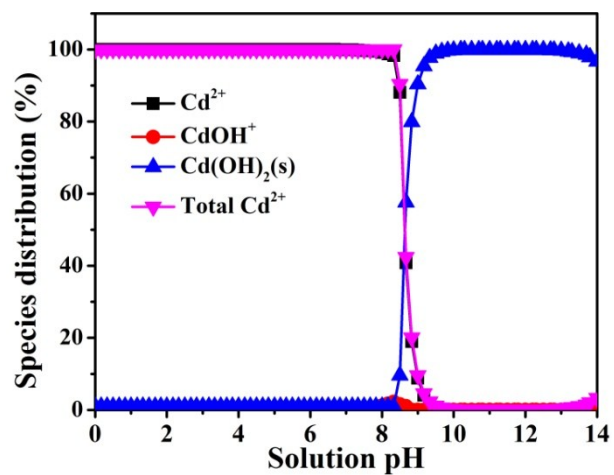

**Figure S1** Distribution of cadmium species as a function of solution pH.

(Simulation condition: Cd concentration = 0.5 mM, temperature = 25 °C).

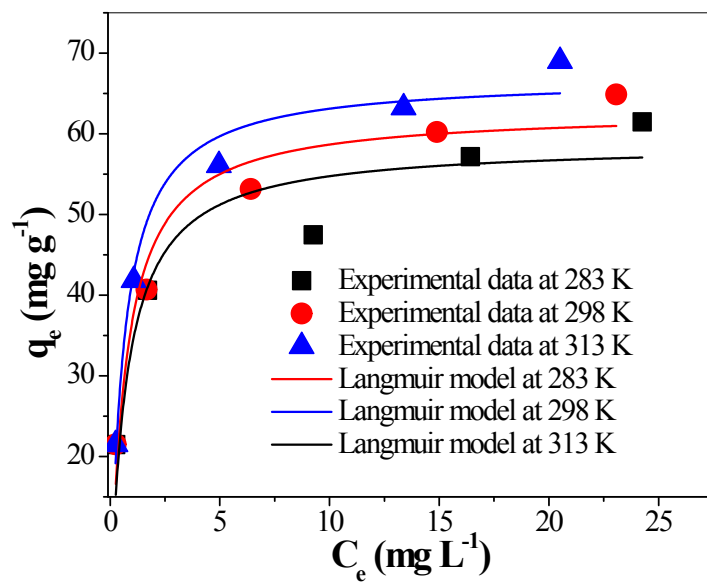

**Figure S2** Effect of temperature on Cd(II) adsorption isotherm on the UFMBO.

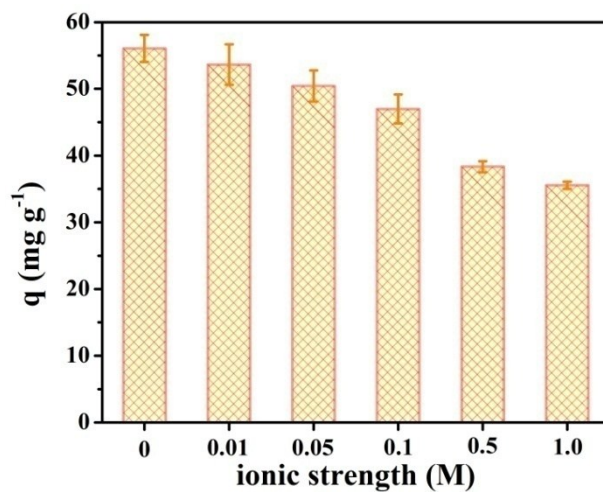

**Figure S3** Effect of ionic strength on adsorption of Cd(II) on the UFMBO.

Experimental conditions: initial Cd(II) concentration = 50 mg L<sup>-1</sup>, adsorbent dosage = 0.5 g L<sup>-1</sup>, temperature = 25 °C, contact time = 24 h, solution pH = 6. Error bars represent the standard deviation of triplicate experiments.

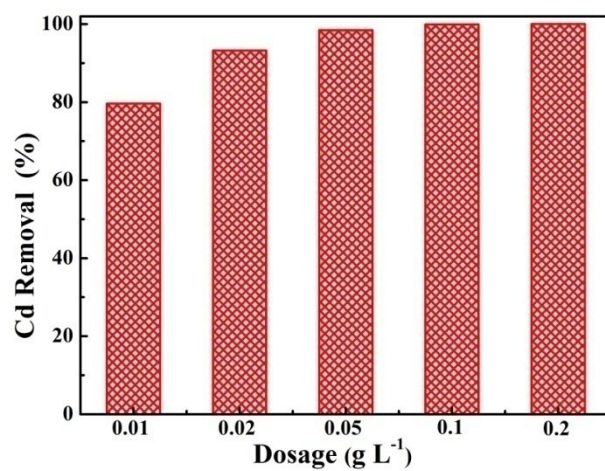

**Figure S4** Removal of trace level of Cd(II) using the UFMBO with different dosages. Experimental conditions: initial Cd(II) concentration = 100  $\mu\text{g L}^{-1}$ ; solution pH = 6.0, contact time = 24 h, temperature = 25  $^{\circ}\text{C}$ .

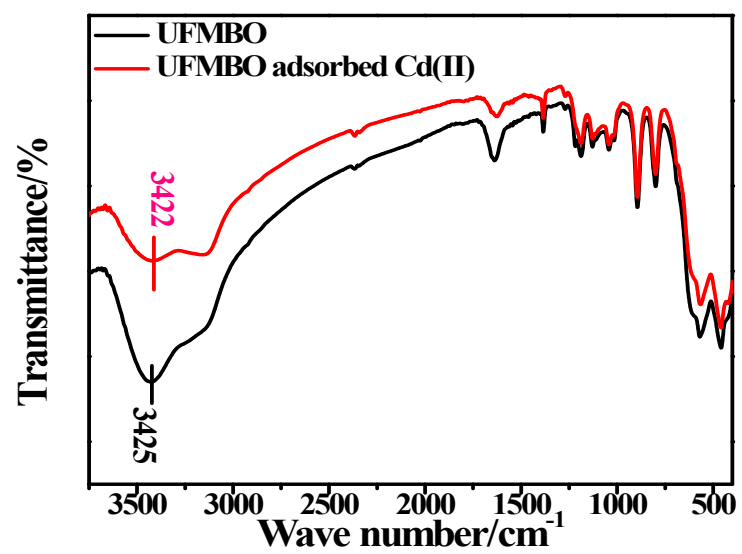

**Figure S5** FTIR spectra of UFMBO before and after Cd(II) adsorption.
